# Supplementary material
Source: MDPI journal article supplement (https://www.mdpi.com/2071-1050/15/17/13070)
Supplement: s1 [file s1 › sustainability-2419037-supplementary.pdf]

## Supplementary

Table S1. Factors of each case design

| Design | No. of factors | Factors                                                                                                                                                                                                                                                                                                                                                                                                                                              |
|--------|----------------|------------------------------------------------------------------------------------------------------------------------------------------------------------------------------------------------------------------------------------------------------------------------------------------------------------------------------------------------------------------------------------------------------------------------------------------------------|
| 1      | 3              | <p>Income increase (Positive, Economic)</p> <p>(1)+ \$100 per month</p> <p>(2)+ \$300 per month</p> <p>(3)+ \$500 per month</p> <p>Population increase (<b>Neutral, Social</b>)</p> <p>(1) A reduced rate of population growth (only 2%)</p> <p>(2) Continued population growth (average rate 4%)</p> <p>(3) An increased population growth (6%)</p> <p>Mine life (Neutral, Governance)</p> <p>(1)10 years</p> <p>(2)20 years</p> <p>(3)30 years</p> |
| 2      | 4              | <p>Air pollution (Negative, Environmental)</p> <p>(1)No increase in pollution</p> <p>(2)A slight increase in pollution</p> <p>(3)A moderate increase in pollution</p>                                                                                                                                                                                                                                                                                |
| 3      | 5              | <p>Job opportunities (Positive, Economic)</p> <p>(1)300 people employed directly by the mine</p> <p>(2)600 people employed directly by the mine</p> <p>(3)900 people employed directly by the mine</p>                                                                                                                                                                                                                                               |
| 4      | 6              | <p>Permit approval decision making mechanism (Neutral, Governance)</p> <p>(1)Final decision solely by Government agency</p> <p>(2)Final decision by Government agency after significant public input</p> <p>(3)Final decision by Government agency after negotiating with local representatives</p>                                                                                                                                                  |

Table S2. Attribute blocks for DCE (\* Positive attribute is shown in bold font)

| Block | Attributes*                                                                                                                                     |
|-------|-------------------------------------------------------------------------------------------------------------------------------------------------|
| 1     | <p><b>Job opportunities</b></p> <p>Water pollution and shortage</p> <p>Permit approval decision making mechanism</p> <p>Population increase</p> |
| 2     | <p><b>Income increase</b> (for all local residents)</p>                                                                                         |

|   |                                                                                                                                                                                |
|---|--------------------------------------------------------------------------------------------------------------------------------------------------------------------------------|
|   | Air pollution<br>Availability of independent and transparent information on potential impacts of mine<br>Crime increase                                                        |
| 3 | Increase in housing costs<br>Noise pollution<br><b>Infrastructure improvement</b> (transportation, education, human serves, internet)<br>Mine buffer (Home distance from mine) |
| 4 | Labor shortage for other business<br>Land pollution and subsidence<br>Traffic increase<br>Mine life                                                                            |
